# Supplementary material
Source: HighWire-hosted journal article supplement (https://bmjopen.bmj.com/content/13/6/e069957)
Supplement: inline-supplementary-material-1 [file inline-supplementary-material-1.pdf]

**2017 CONSORT checklist of information to include when reporting a randomized trial assessing nonpharmacologic treatments (NPTs)\*. Modifications of the extension appear in italics and blue.**

| Section/Topic Item        | Checklist item no. | CONSORT item                                                                                                                          | Extension for NPT trials                                                                                                                                                    | Page                     |
|---------------------------|--------------------|---------------------------------------------------------------------------------------------------------------------------------------|-----------------------------------------------------------------------------------------------------------------------------------------------------------------------------|--------------------------|
| <b>Title and abstract</b> |                    |                                                                                                                                       |                                                                                                                                                                             |                          |
|                           | 1a                 | Identification as a randomized trial in the title                                                                                     |                                                                                                                                                                             | 1                        |
|                           | 1b                 | Structured summary of trial design, methods, results, and conclusions (for specific guidance see CONSORT for abstracts)               | <i>Refer to CONSORT extension for abstracts for NPT trials</i>                                                                                                              | 3                        |
| <b>Introduction</b>       |                    |                                                                                                                                       |                                                                                                                                                                             |                          |
| Background and objectives | 2a                 | Scientific background and explanation of rationale                                                                                    |                                                                                                                                                                             | 4, 5                     |
|                           | 2b                 | Specific objectives or hypotheses                                                                                                     |                                                                                                                                                                             | 4, 5                     |
| <b>Methods</b>            |                    |                                                                                                                                       |                                                                                                                                                                             |                          |
| Trial design              | 3a                 | Description of trial design (such as parallel, factorial) including allocation ratio                                                  | When applicable, how care providers were allocated to each trial group                                                                                                      | 6:10                     |
|                           | 3b                 | Important changes to methods after trial commencement (such as eligibility criteria), with reasons                                    |                                                                                                                                                                             | 6, 8                     |
| Participants              | 4a                 | Eligibility criteria for participants                                                                                                 | When applicable, eligibility criteria for centers and for <i>care providers</i>                                                                                             | 6                        |
|                           | 4b                 | Settings and locations where the data were collected                                                                                  |                                                                                                                                                                             | 6                        |
| Interventions †           | 5                  | The interventions for each group with sufficient details to allow replication, including how and when they were actually administered | Precise details of both the experimental treatment and comparator                                                                                                           | 7, 8                     |
|                           | 5a                 |                                                                                                                                       | Description of the different components of the interventions and, when applicable, description of the procedure for tailoring the interventions to individual participants. | 7, supplementary figures |
|                           | 5b                 |                                                                                                                                       | Details <i>of whether and</i> how the interventions were standardized.                                                                                                      | 7, supplementary figures |
|                           | 5c.                |                                                                                                                                       | Details <i>of whether and</i> how adherence of care providers to the protocol was assessed or enhanced                                                                      | 8, supplementary figures |

*Cite as:* Boutron I, Altman DG, Moher D, Schulz KF, Ravaud P. CONSORT Statement for Randomized Trials of Nonpharmacologic Treatments: A 2017 Update and a CONSORT Extension for Nonpharmacologic Trial Abstracts. *Annals of Internal Medicine*. 2017 Jul 4;167(1):40–7.

| Section/Topic Item                 | Checklist item no. | CONSORT item                                                                                                                                                                                | Extension for NPT trials                                                                                                                                                        | Page  |
|------------------------------------|--------------------|---------------------------------------------------------------------------------------------------------------------------------------------------------------------------------------------|---------------------------------------------------------------------------------------------------------------------------------------------------------------------------------|-------|
|                                    | 5d                 |                                                                                                                                                                                             | <i>Details of whether and how adherence of participants to interventions was assessed or enhanced</i>                                                                           | 8     |
| Outcomes                           | 6a                 | Completely defined pre-specified primary and secondary outcome measures, including how and when they were assessed                                                                          |                                                                                                                                                                                 | 8, 9  |
|                                    | 6b                 | Any changes to trial outcomes after the trial commenced, with reasons                                                                                                                       |                                                                                                                                                                                 | 7, 9  |
| Sample size                        | 7a                 | How sample size was determined                                                                                                                                                              | When applicable, details of whether and how the clustering by care providers or centers was addressed                                                                           | 9, 10 |
|                                    | 7b                 | When applicable, explanation of any interim analyses and stopping guidelines                                                                                                                |                                                                                                                                                                                 | NA    |
| Randomization:                     |                    |                                                                                                                                                                                             |                                                                                                                                                                                 | 6, 7  |
| - Sequence generation              | 8a                 | Method used to generate the random allocation sequence                                                                                                                                      |                                                                                                                                                                                 | 6, 7  |
|                                    | 8b                 | Type of randomization; details of any restriction (such as blocking and block size)                                                                                                         |                                                                                                                                                                                 | 6, 7  |
| - Allocation concealment mechanism | 9                  | Mechanism used to implement the random allocation sequence (such as sequentially numbered containers), describing any steps taken to conceal the sequence until interventions were assigned |                                                                                                                                                                                 | 6, 7  |
| - Implementation                   | 10                 | Who generated the random allocation sequence, who enrolled participants, and who assigned participants to interventions                                                                     |                                                                                                                                                                                 | 6, 7  |
| Blinding                           | 11a                | If done, who was blinded after assignment to interventions (for example, participants, care providers, those assessing outcomes) and how                                                    | If done, who was blinded after assignment to interventions (e.g., participants, care providers, <i>those administering co-interventions</i> , those assessing outcomes) and how | 8     |
|                                    | 11b                | If relevant, description of the similarity of interventions                                                                                                                                 | If blinded, method of blinding and description of the similarity of interventions                                                                                               | NA    |
|                                    | 11c                |                                                                                                                                                                                             | <i>If blinding was not possible, description of any attempts to limit bias</i>                                                                                                  | 8     |

**Cite as:** Boutron I, Altman DG, Moher D, Schulz KF, Ravaud P. CONSORT Statement for Randomized Trials of Nonpharmacologic Treatments: A 2017 Update and a CONSORT Extension for Nonpharmacologic Trial Abstracts. *Annals of Internal Medicine*. 2017 Jul 4;167(1):40–7.

| Section/Topic Item                                   | Checklist item no. | CONSORT item                                                                                                                                      | Extension for NPT trials                                                                                                                                     | Page                                     |
|------------------------------------------------------|--------------------|---------------------------------------------------------------------------------------------------------------------------------------------------|--------------------------------------------------------------------------------------------------------------------------------------------------------------|------------------------------------------|
| Statistical methods                                  | 12a                | Statistical methods used to compare groups for primary and secondary outcomes                                                                     | When applicable, details of whether and how the clustering by care providers or centers was addressed                                                        | 9, 10                                    |
|                                                      | 12b                | Methods for additional analyses, such as subgroup analyses and adjusted analyses                                                                  |                                                                                                                                                              | 9, 10                                    |
| <b>Results</b>                                       |                    |                                                                                                                                                   |                                                                                                                                                              |                                          |
| Participant flow (a diagram is strongly recommended) | 13a                | For each group, the numbers of participants who were randomly assigned, received intended treatment, and were analyzed for the primary outcome    | The number of care providers or centers performing the intervention in each group and the number of patients treated by each care provider or in each center | 11, figure 1                             |
|                                                      | 13b                | For each group, losses and exclusions after randomization, together with reasons                                                                  |                                                                                                                                                              | 11, figure 1                             |
|                                                      | 13c                |                                                                                                                                                   | <i>For each group, the delay between randomization and the initiation of the intervention</i>                                                                | <i>Supplementary figures</i>             |
|                                                      | new                |                                                                                                                                                   | Details of the experimental treatment and comparator as they were implemented                                                                                | <i>Supplementary figures</i>             |
| Recruitment                                          | 14a                | Dates defining the periods of recruitment and follow-up                                                                                           |                                                                                                                                                              | <b>11, figure 1</b>                      |
|                                                      | 14b                | Why the trial ended or was stopped                                                                                                                |                                                                                                                                                              | <b>11</b>                                |
| Baseline data                                        | 15                 | A table showing baseline demographic and clinical characteristics for each group                                                                  | When applicable, a description of care providers (case volume, qualification, expertise, etc.) and centers (volume) in each group.                           | Table 1                                  |
| Numbers analyzed                                     | 16                 | For each group, number of participants (denominator) included in each analysis and whether the analysis was by original assigned groups           |                                                                                                                                                              | 11, 12, Table 1                          |
| Outcomes and estimation                              | 17a                | For each primary and secondary outcome, results for each group, and the estimated effect size and its precision (such as 95% confidence interval) |                                                                                                                                                              | 11, 12, table 2, 3 and figure 2, 3 and 4 |
|                                                      | 17b                | For binary outcomes, presentation of both absolute and relative effect sizes is recommended                                                       |                                                                                                                                                              | 11, 12, table 2, 3 and figure 2, 3 and 4 |
| Ancillary analyses                                   | 18                 | Results of any other analyses performed, including subgroup analyses and adjusted analyses, distinguishing pre-specified from exploratory         |                                                                                                                                                              | 11, 12, table 2, 3 and figure 2, 3 and 4 |

*Cite as: Boutron I, Altman DG, Moher D, Schulz KF, Ravaud P. CONSORT Statement for Randomized Trials of Nonpharmacologic Treatments: A 2017 Update and a CONSORT Extension for Nonpharmacologic Trial Abstracts. Annals of Internal Medicine. 2017 Jul 4;167(1):40-7.*

| Section/Topic Item       | Checklist item no. | CONSORT item                                                                                                     | Extension for NPT trials                                                                                                                                              | Page  |
|--------------------------|--------------------|------------------------------------------------------------------------------------------------------------------|-----------------------------------------------------------------------------------------------------------------------------------------------------------------------|-------|
| Harms                    | 19                 | All important harms or unintended effects in each group (for specific guidance see CONSORT for harms)            |                                                                                                                                                                       | NA    |
| <b>Discussion</b>        |                    |                                                                                                                  |                                                                                                                                                                       |       |
| Limitations              | 20                 | Trial limitations, addressing sources of potential bias, imprecision, and, if relevant, multiplicity of analyses | In addition, take into account the choice of the comparator, lack of or partial blinding, and unequal expertise of care providers or centers in each group            | 3, 15 |
| Generalizability         | 21                 | Generalizability (external validity, applicability) of the trial findings                                        | Generalizability (external validity) of the trial findings according to the intervention, comparators, patients, and care providers and centers involved in the trial | 13-15 |
| Interpretation           | 22                 | Interpretation consistent with results, balancing benefits and harms, and considering other relevant evidence    |                                                                                                                                                                       | 13-15 |
| <b>Other information</b> |                    |                                                                                                                  |                                                                                                                                                                       |       |
| Registration             | 23                 | Registration number and name of trial registry                                                                   |                                                                                                                                                                       | 6     |
| Protocol                 | 24                 | Where the full trial protocol can be accessed, if available                                                      |                                                                                                                                                                       | 6     |
| Funding                  | 25                 | Sources of funding and other support (such as supply of drugs), role of funders                                  |                                                                                                                                                                       | 16    |

\*Additions or modifications to the 2010 CONSORT checklist. CONSORT = Consolidated Standards of Reporting Trials

†The items 5, 5a, 5b, 5c, 5d are consistent with the Template for Intervention Description and Replication (TIDieR) checklist

**Cite as:** Boutron I, Altman DG, Moher D, Schulz KF, Ravaud P. CONSORT Statement for Randomized Trials of Nonpharmacologic Treatments: A 2017 Update and a CONSORT Extension for Nonpharmacologic Trial Abstracts. *Annals of Internal Medicine*. 2017 Jul 4;167(1):40–7.
