# Supplementary material
Source: HighWire-hosted journal article supplement (https://bmjopen.bmj.com/content/13/6/e069957)
Supplement: inline-supplementary-material-2 [file inline-supplementary-material-2.pdf]

## Supplementary figure 1. Study course MUSYC trial

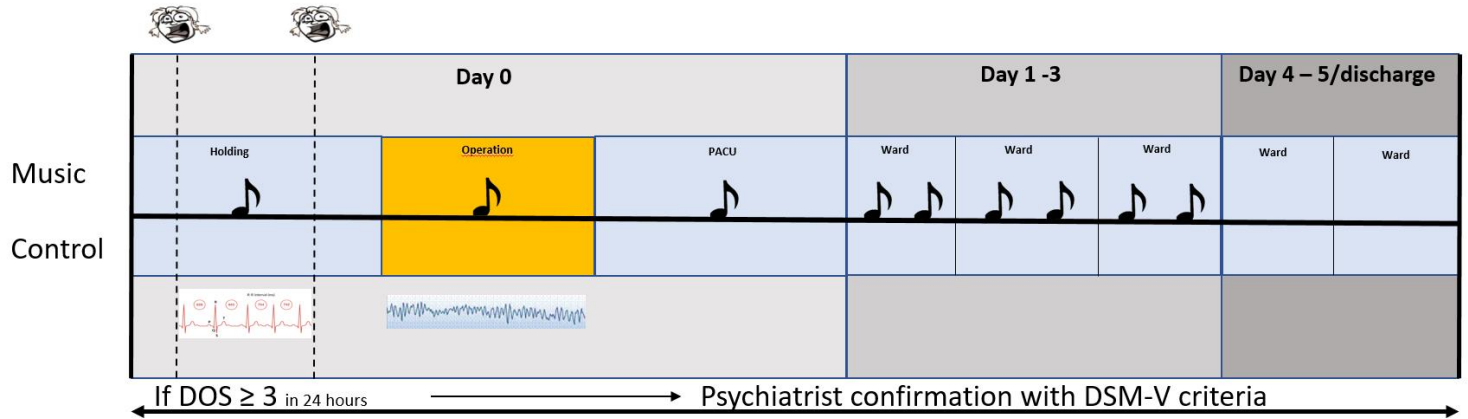

Course trial: after randomization, both groups receive ECG recording and two times anxiety measures. Intra-operative BIS registration is applied for depth of anesthesia. All participating subjects are treated according to standard care and delirium is measured until day 5 or discharge. Participants in the intervention group additionally receive music intervention 30 minutes before surgery, intra-operative during the entire operation, 30 minutes after surgery and twice per day 30 minutes until post-operative day 3.
