# Supplementary material
Source: HighWire-hosted journal article supplement (https://bmjopen.bmj.com/content/13/6/e069957)
Supplement: inline-supplementary-material-3 [file inline-supplementary-material-3.pdf]

**Supplementary table 1. Adherence to music intervention during trial**

|                                                                                                                                                                                                                                                                                                            | Day 0 |      |      | Day 1   |      | Day 2   |      | Day 3   |      |
|------------------------------------------------------------------------------------------------------------------------------------------------------------------------------------------------------------------------------------------------------------------------------------------------------------|-------|------|------|---------|------|---------|------|---------|------|
| Moment <sup>1</sup>                                                                                                                                                                                                                                                                                        | Pre   | Per  | Post | Morning | Noon | Morning | Noon | Morning | Noon |
| <b>N<sup>2</sup></b>                                                                                                                                                                                                                                                                                       | 91    | 91   | 91   | 91      | 91   | 88      | 88   | 70      | 70   |
| <b>Music</b>                                                                                                                                                                                                                                                                                               |       |      |      |         |      |         |      |         |      |
| <b>No</b>                                                                                                                                                                                                                                                                                                  | 3     | 0    | 21   | 25      | 26   | 26      | 21   | 19      | 20   |
| <b>Yes</b>                                                                                                                                                                                                                                                                                                 | 79    | 91   | 61   | 59      | 45   | 44      | 39   | 24      | 18   |
| <b>Unknown<sup>3</sup></b>                                                                                                                                                                                                                                                                                 | 9     | 0    | 9    | 7       | 20   | 18      | 28   | 27      | 32   |
| <b>Adherence<sup>4</sup></b>                                                                                                                                                                                                                                                                               | 96%   | 100% | 74%  | 70%     | 63%  | 63%     | 65%  | 56%     | 47%  |
| Patients in the mITT population allocated to the music group. 1. Session of 30 minutes in the morning or afternoon. 2. Amount of patients in the musical group not discharged from the ward. 3. Unregistered music session. 4. Adherence calculated from the registered patients (i.e. 'Yes'/'No' + 'Yes') |       |      |      |         |      |         |      |         |      |
