# Supplementary material
Source: HighWire-hosted journal article supplement (https://bmjopen.bmj.com/content/13/6/e069957)
Supplement: inline-supplementary-material-4 [file inline-supplementary-material-4.pdf]

**Supplementary figure 2. Course delirium diagnosis**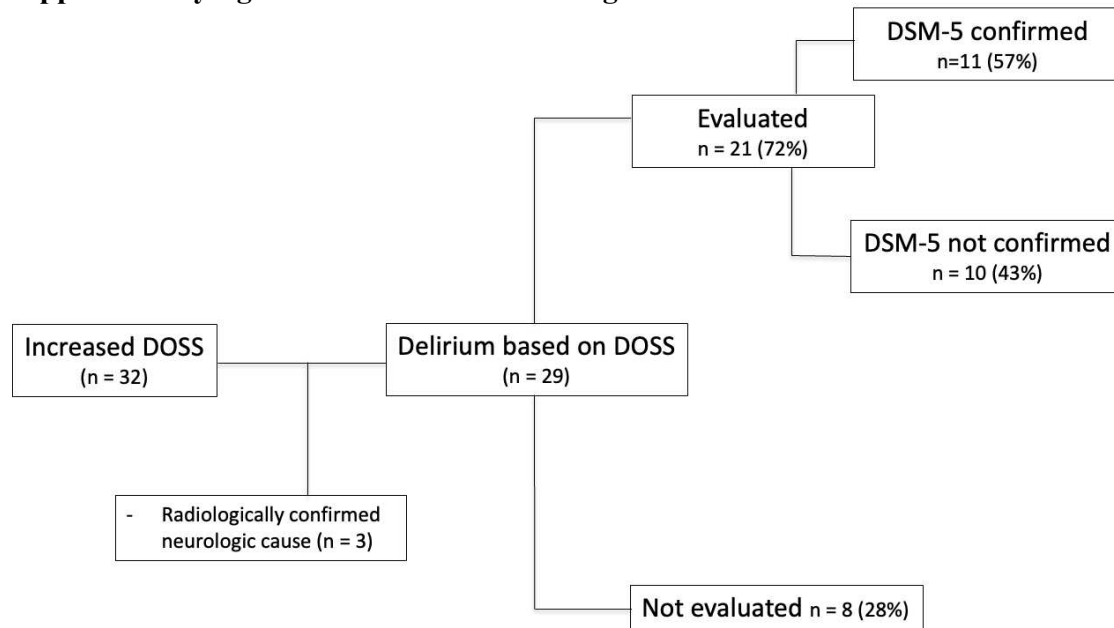

Delirium diagnosis flowchart, diagnosis of delirium required a two-step procedure. First, all participants were screened with the DOS scale. Second, in case of a daily mean score of 3 or higher (and no neurologic cause was radiologically found) a psychiatrist was consulted to assess the clinical diagnosis of delirium based on the DSM-5 criteria. In 8 patients, the psychiatrist was not consulted due to logistic issues.
